# Supplementary material for: QTL Analysis of Resistance to High-Intensity UV-B Irradiation in Soybean (Glycine max [L.] Merr.)
Source: PubMed Central journal article supplement (PMC6651677; doi:10.3390/ijms20133287), 2019-07-04
Supplement: ijms-20-03287-s001.pdf [file ijms-20-03287-s001.pdf]

## Supplementary Tables and Figures

Supplementary Table 1. Statistic summary of GBS sequencing and SNP data.

|                                 | Library 1   | Library 2   |
|---------------------------------|-------------|-------------|
| No. of lines                    | 88          | 88          |
| No. of raw GBS reads            | 280,550,845 | 282,130,604 |
| No. of high-quality clean reads | 220,247,631 | 220,247,626 |
| Average of reads per line       | 3,188,077   | 3,206,029   |
| Maximum                         | 8,398,367   | 10,657,712  |
| Minimum                         | 1,410,429   | 1,147,211   |
| Total no. of SNPs               |             | 271,254     |
| No. of filtered SNPs            |             | 4,604       |

Supplementary Table 2. Marker number and average marker interval by chromosome of the soybean genetic linkage map from the Cheongja 3 x Buseok population.

| Linkage group | Number of markers | Length (cM) | Avg. marker distance (cM) |
|---------------|-------------------|-------------|---------------------------|
| Chr01         | 106               | 163.5       | 1.5                       |
| Chr02         | 132               | 101.9       | 0.8                       |
| Chr03         | 114               | 215.1       | 1.9                       |
| Chr04         | 61                | 139.3       | 2.3                       |
| Chr05         | 59                | 121.9       | 2.1                       |
| Chr06         | 250               | 248.5       | 1.0                       |
| Chr07         | 105               | 78.9        | 0.8                       |
| Chr08         | 166               | 270.0       | 1.6                       |
| Chr09         | 166               | 175.3       | 1.1                       |
| Chr10         | 217               | 247.4       | 1.1                       |
| Chr11         | 64                | 93.8        | 0.5                       |
| Chr12         | 106               | 176.3       | 1.7                       |
| Chr13         | 195               | 164.7       | 0.8                       |
| Chr14         | 198               | 213.0       | 1.1                       |
| Chr15         | 319               | 269.2       | 0.8                       |
| Chr16         | 95                | 65.8        | 0.7                       |
| Chr17         | 227               | 235.0       | 1.0                       |
| Chr18         | 310               | 255.3       | 0.8                       |
| Chr19         | 83                | 162.2       | 2.0                       |
| Chr20         | 163               | 210.2       | 1.3                       |
| Total         | 3,136             | 3607.3      | 1.2                       |

Supplementary Table 3. List of two, five, and 60 genes located in three QTLs *UVBR12-1*, *UVBR6-1*, and *UVBR14-1*, respectively.

| <b>G.max ID</b> | <b>Gene position</b>     | <b>Gene annotation</b>                                                          | <b><i>A. Thaliana</i> homolog</b> |
|-----------------|--------------------------|---------------------------------------------------------------------------------|-----------------------------------|
| Glyma.12g088600 | Chr12:7254584..7264767   | Unknown protein                                                                 | AT5G22450.1                       |
| Glyma.12g088700 | Chr12:7269086..7277812   | bZIP transcription factor family protein (bZIP21/TGA9)                          | AT1G08320.1                       |
| Glyma.06g319600 | Chr06:50850357..50851530 | Leucine-rich repeat (LRR) family protein                                        | AT1G33590.1                       |
| Glyma.06g319700 | Chr06:50856253..50858320 | Leucine-rich repeat (LRR) family protein                                        | AT1G33590.1                       |
| Glyma.06g319800 | Chr06:50861494..50863853 | alfin-like 1                                                                    | AT5G05610.1                       |
| Glyma.06g319900 | Chr06:50865413..50868583 | FAM136A-like protein                                                            | AT2G31725.1                       |
| Glyma.06g320000 | Chr06:50870241..50873816 | FAM136A-like protein                                                            | AT2G31725.1                       |
| Glyma.14g201800 | Chr14:46728613..46733836 | Peroxidase superfamily protein                                                  | AT5G58400.1                       |
| Glyma.14g201900 | Chr14:46736415..46739060 | Defender against death (DAD family) protein (ATDAD1)                            | AT1G32210.1                       |
| Glyma.14g202000 | Chr14:46741879..46743234 | RING/U-box superfamily protein with ARM repeat domain                           | AT2G23140.1                       |
| Glyma.14g202100 | Chr14:46745358..46746830 | Tyrosyl-tRNA synthetase, class Ib, bacterial/mitochondrial                      | AT3G02660.1                       |
| Glyma.14g202200 | Chr14:46749403..46751364 | Tetratricopeptide repeat (TPR)-like superfamily protein                         | AT1G12300.1                       |
| Glyma.14g202300 | Chr14:46754911..46760152 | LOB domain-containing protein 13 (LBD13)                                        | AT2G30340.1                       |
| Glyma.14g202400 | Chr14:46768802..46772377 | Exostosin family protein                                                        | AT1G21480.1                       |
| Glyma.14g202500 | Chr14:46773824..46775761 | Exostosin family protein                                                        | AT1G21480.1                       |
| Glyma.14g202600 | Chr14:46775998..46777307 | Duplicated homeodomain-like superfamily protein                                 | AT3G11280.1                       |
| Glyma.14g202700 | Chr14:46777725..46778009 | CBL-interacting protein kinase 2 (CIPK2)                                        | AT5G07070.1                       |
| Glyma.14g202800 | Chr14:46779014..46779719 | Methyltransferase-related protein                                               | AT5G58375.1                       |
| Glyma.14g202900 | Chr14:46782700..46783789 | allergen-related (CHAL, EPFL6)                                                  | AT2G30370.1                       |
| Glyma.14g203000 | Chr14:46787303..46790554 | SOS3-interacting protein 4 (CIPK11,PKS5,SIP4,SNRK3.22)                          | AT2G30360.1                       |
| Glyma.14g203100 | Chr14:46803543..46806680 | allergen-related (CHAL, EPFL6)                                                  | AT2G30370.1                       |
| Glyma.14g203200 | Chr14:46804365..46804565 | Unknown protein                                                                 |                                   |
| Glyma.14g203300 | Chr14:46813126..46814258 | Unknown protein                                                                 |                                   |
| Glyma.14g203400 | Chr14:46818113..46820666 | Unknown protein                                                                 |                                   |
| Glyma.14g203500 | Chr14:46821151..46822027 | ovate family protein 17 (ATOFP17,OPF17)                                         | AT2G30395.1                       |
| Glyma.14g203600 | Chr14:46826523..46827888 | ovate family protein 3 (ATOFP3,OPF3)                                            | AT5G58360.1                       |
| Glyma.14g203700 | Chr14:46828582..46834138 | with no lysine (K) kinase 4 (WNK4, ZIK2)                                        | AT5G58350.1                       |
| Glyma.14g203800 | Chr14:46841491..46853116 | PAP/OAS1 substrate-binding domain superfamily                                   | AT3G51620.2                       |
| Glyma.14g203900 | Chr14:46856580..46859641 | expansin A8 (ATEXP8,ATEXPA8,ATHEXP ALPHA 1.11,EXP8,EXPA8)                       | AT2G40610.1                       |
| Glyma.14g204000 | Chr14:46883204..46883614 | Unknown protein                                                                 |                                   |
| Glyma.14g204100 | Chr14:46886862..46890243 | Basic-leucine zipper (bZIP) transcription factor family protein                 | AT2G40620.1                       |
| Glyma.14g204200 | Chr14:46893813..46897703 | extra-large G-protein 1                                                         | AT2G23460.1                       |
| Glyma.14g204300 | Chr14:46909226..46909477 | AGC (cAMP-dependent, cGMP-dependent and protein kinase C) kinase family protein | AT2G20470.1                       |
| Glyma.14g204400 | Chr14:46936057..46943868 | high-level expression of sugar-inducible gene 2 (HSI2,VAL1)                     | AT2G30470.1                       |
| Glyma.14g204500 | Chr14:46946496..46957734 | NB-ARC domain-containing disease resistance protein                             | AT4G27190.1                       |

|                 |                          |                                                                             |             |
|-----------------|--------------------------|-----------------------------------------------------------------------------|-------------|
| Glyma.14g204600 | Chr14:46968705..46974585 | NB-ARC domain-containing disease resistance protein                         | AT4G27220.1 |
| Glyma.14g204700 | Chr14:46981104..46996696 | NB-ARC domain-containing disease resistance protein                         | AT4G27220.1 |
| Glyma.14g204800 | Chr14:46984060..46984741 | Unknown protein                                                             |             |
| Glyma.14g204900 | Chr14:47000358..47001315 | NB-ARC domain-containing disease resistance protein                         | AT4G27220.1 |
| Glyma.14g205000 | Chr14:47005574..47019661 | NB-ARC domain-containing disease resistance protein                         | AT4G27220.1 |
| Glyma.14g205100 | Chr14:47020646..47026852 | Kinase interacting (KIP1-like) family protein                               | AT5G58320.2 |
| Glyma.14g205200 | Chr14:47041931..47046048 | cinnamate-4-hydroxylase (ATC4H,C4H,CYP73A5,REF3)                            | AT2G30490.1 |
| Glyma.14g205300 | Chr14:47046209..47056610 | NB-ARC domain-containing disease resistance protein                         | AT4G27220.1 |
| Glyma.14g205400 | Chr14:47059088..47060670 | Unknown protein                                                             |             |
| Glyma.14g205500 | Chr14:47061905..47067563 | eukaryotic translation initiation factor 2 beta subunit (EIF2 BETA,EMB1401) | AT5G20920.1 |
| Glyma.14g205600 | Chr14:47079122..47081495 | cytokinin response factor 4 (CRF 4)                                         | AT4G27950.1 |
| Glyma.14g205700 | Chr14:47085767..47091016 | ubiquitin conjugating enzyme 8 (ATUBC8,UBC8)                                | AT5G41700.1 |
| Glyma.14g205800 | Chr14:47089296..47089496 | Unknown protein                                                             |             |
| Glyma.14g205900 | Chr14:47094145..47095799 | Unknown protein                                                             |             |
| Glyma.14g206000 | Chr14:47096077..47101943 | Leucine-rich repeat protein kinase family protein                           | AT5G58300.1 |
| Glyma.14g206100 | Chr14:47121840..47125184 | Phototropic-responsive NPH3 family protein (RPT2)                           | AT2G30520.1 |
| Glyma.14g206200 | Chr14:47136840..47148766 | Leucine-rich repeat protein kinase family protein                           | AT1G06840.1 |
| Glyma.14g206300 | Chr14:47152323..47167818 | Leucine-rich repeat protein kinase family protein                           | AT1G06840.1 |
| Glyma.14g206400 | Chr14:47170359..47171797 | Unknown protein                                                             |             |
| Glyma.14g206500 | Chr14:47181077..47199983 | NB-ARC domain-containing disease resistance protein                         | AT4G27190.1 |
| Glyma.14g206600 | Chr14:47200162..47203571 | Cation efflux family protein                                                | AT3G58060.1 |
| Glyma.14g206700 | Chr14:47204975..47207366 | Cytochrome b-c1 complex, subunit 8 protein                                  | AT3G10860.1 |
| Glyma.14g206800 | Chr14:47208588..47212843 | RNA-binding KH domain-containing protein                                    | AT2G38610.1 |
| Glyma.14g206900 | Chr14:47215859..47220940 | NB-ARC domain-containing disease resistance protein                         | AT4G27220.1 |
| Glyma.14g207000 | Chr14:47264742..47265649 | Yippee family putative zinc-binding protein                                 | AT4G27745.1 |
| Glyma.14g207100 | Chr14:47266214..47268996 | Tetratricopeptide repeat (TPR)-like superfamily protein                     | AT5G16860.1 |
| Glyma.14g207200 | Chr14:47290893..47309462 | ABC transporter of the mitochondrion 3 (ATATM3,ATM3,STA1)                   | AT5G58270.1 |
| Glyma.14g207300 | Chr14:47312711..47319651 | Tetratricopeptide repeat (TPR)-like superfamily protein                     | AT5G51340.1 |
| Glyma.14g207400 | Chr14:47325884..47329827 | Unknown protein                                                             |             |
| Glyma.14g207500 | Chr14:47331497..47335155 | TRAM, LAG1 and CLN8 (TLC) lipid-sensing domain containing protein           | AT4G10360.1 |
| Glyma.14g207600 | Chr14:47338112..47341438 | Cystathionine beta-synthase (CBS) family protein                            | AT5G10860.1 |
| Glyma.14g207700 | Chr14:47365910..47369153 | Thiamine pyrophosphate dependent pyruvate decarboxylase family protein      | AT5G17380.1 |

---

Supplementary Table 4. Detailed information of SNPs in genes in the two QTLs *UVBR12-1* and *UVBR6-1* between Cheongja 3 and Buseok.

| Gene ID         | Location       | Cheongja 3      | Buseok            | Variant                     | Effect   |
|-----------------|----------------|-----------------|-------------------|-----------------------------|----------|
| Glyma.12G088600 | Chr12:7253257  | A               | C                 | 2kb upstream gene variant   | Modifier |
|                 | Chr12:7255288  | G               | A                 | 5 prime UTR variation       | Modifier |
|                 | Chr12:7257002  | T               | G                 | Intron variant              | Modifier |
|                 | Chr12:7261430  | T               | C                 | synonymous variant          | Low      |
|                 | Chr12:7264812  | A               | G                 | 2kb downstream gene variant |          |
|                 | Chr12:7265032  | C               | T                 |                             |          |
|                 | Chr12:7265072  | T               | C                 |                             |          |
|                 | Chr12:7265224  | G               | A                 |                             |          |
|                 | Chr12:7265449  | G               | A                 |                             |          |
| Glyma.12G088700 | Chr12:7267156  | C               | T                 | 2kb downstream gene variant |          |
|                 | Chr12:7267333  | C               | T                 |                             |          |
|                 | Chr12:7267381  | T               | C                 |                             |          |
|                 | Chr12:7268635  | G               | A                 |                             |          |
|                 | Chr12:7268641  | CATATATATA      | CATATATATATATA    |                             |          |
|                 | Chr12:7269105  | A               | T                 | 3 prime UTR variation       | Modifier |
|                 | Chr12:7269114  | A               | C                 |                             |          |
|                 | Chr12:7269134  | G               | C                 |                             |          |
|                 | Chr12:7269427  | G               | C                 |                             |          |
|                 | Chr12:7269446  | AATATATATAT     | AATATATATATAT     |                             |          |
|                 | Chr12:7269470  | G               | A                 | synonymous variant          | Low      |
|                 | Chr12:7269969  | GA              | GAA               | Intron variant              | Modifier |
|                 | Chr12:7270731  | G               | C                 |                             |          |
|                 | Chr12:7270961  | A               | T                 |                             |          |
|                 | Chr12:7271300  | G               | A                 |                             |          |
|                 | Chr12:7271427  | GAAAAAAAA       | GAAAAAAAA         |                             |          |
|                 | Chr12:7272190  | C               | T                 |                             |          |
|                 | Chr12:7273748  | A               | G                 |                             |          |
|                 | Chr12:7274159  | T               | G                 |                             |          |
|                 | Chr12:7276044  | G               | A                 |                             |          |
|                 | Chr12:7274363  | A               | T                 |                             |          |
|                 | Chr12:7273570  | C               | T                 | synonymous variant          | Low      |
|                 | Chr12:7278085  | C               | T                 | 2kb upstream gene variant   | Modifier |
|                 | Chr12:7278656  | A               | G                 |                             |          |
|                 | Chr12:7279303  | T               | G                 |                             |          |
| Chr12:7279517   | G              | C               |                   |                             |          |
| Chr12:7279520   | T              | A               |                   |                             |          |
| Glyma.06G319700 | Chr06:50855321 | G               | T                 | 2kb upstream gene variant   | Modifier |
|                 | Chr06:50855927 | CTATATATATATATA | CTATATATATATATATA |                             |          |
|                 | Chr06:50857778 | T               | G                 | <b>missense variant</b>     | High     |
|                 | Chr06:50857797 | C               | G                 | <b>missense variant</b>     | High     |
| Glyma.06G319900 | Chr06:50864988 | A               | C                 | 2kb upstream gene variant   | Modifier |
|                 | Chr06:50864989 | A               | T                 |                             |          |
|                 | Chr06:50865052 | A               | G                 |                             |          |
|                 | Chr06:50865118 | G               | A                 |                             |          |
|                 | Chr06:50865950 | GTTTTTT         | GTTTTTTT          | Intron variant              | Modifier |
|                 | Chr06:50868590 | T               | C                 | 2kb downstream gene variant | Modifier |
|                 | Chr06:50868771 | T               | C                 |                             |          |
| Chr06:50869183  | G              | T               |                   |                             |          |
| Glyma.06G320000 | Chr06:50871160 | T               | C                 | Intron variant              | Modifier |
|                 | Chr06:50871325 | T               | C                 |                             |          |
|                 | Chr06:50871579 | T               | C                 |                             |          |
|                 | Chr06:50874007 | G               | A                 | 2kb downstream gene variant | Modifier |
|                 | Chr06:50874122 | TACAC           | TACACAC           |                             |          |

Supplementary Table 5. Summary of SNPs near and/or within genes in *UVBR12-1* and *UVBR6-1*.

| Gene ID         | Number of SNPs |        |     |        |        |                | Total |
|-----------------|----------------|--------|-----|--------|--------|----------------|-------|
|                 | 2kb upstream   | 5'-UTR | CDS | Intron | 3'-UTR | 2kb downstream |       |
| Glyma.12G088600 | 1              | 1      | 1   | 1      |        | 5              | 9     |
| Glyma.12G088700 | 5              |        | 2   | 10     | 3      | 5              | 25    |
| Glyma.06G319600 |                |        |     |        |        |                | -     |
| Glyma.06G319700 | 2              |        | 2   |        |        |                | 4     |
| Glyma.06G319800 |                |        |     |        |        |                | -     |
| Glyma.06G319900 | 4              |        |     | 1      |        | 3              | 8     |
| Glyma.06G320000 |                |        |     | 3      |        | 2              | 5     |

CDS, coding sequence; UTR, untranslated region

Supplementary Table 6. Barcode sequences used for GBS library construction.

|    | <b>Barcode</b> | <b>adapter top</b>                   | <b>adapter bottom</b>                   |
|----|----------------|--------------------------------------|-----------------------------------------|
| 1  | TGACGCCA       | cacgacgctctccgatctTGACGCCA           | CWGTGGCGTCAagatcggaagagcgctcgtg         |
| 2  | CAGATA         | cacgacgctctccgatctCAGATA             | CWGTATCTGagatcggaagagcgctcgtg           |
| 3  | CTCC           | acactctttccctacacgacgctctccgatctCTCC | CWGGGAGagatcggaagagcgctcgtgtagggaagagtg |
| 4  | TAGCGGAT       | cacgacgctctccgatctTAGCGGAT           | CWGATCCGCTAagatcggaagagcgctcgtg         |
| 5  | TATTCGCAT      | cacgacgctctccgatctTATTCGCAT          | CWGATGCGAATAagatcggaagagcgctcgtg        |
| 6  | ATAGAT         | cacgacgctctccgatctATAGAT             | CWGATCTATagatcggaagagcgctcgtg           |
| 7  | CCGAACA        | cacgacgctctccgatctCCGAACA            | CWGTGTTGCGagatcggaagagcgctcgtg          |
| 8  | GGAAGACAT      | cacgacgctctccgatctGGAAGACAT          | CWGATGTCTTCCagatcggaagagcgctcgtg        |
| 9  | GGCTTA         | cacgacgctctccgatctGGCTTA             | CWGTAAGCCagatcggaagagcgctcgtg           |
| 10 | AACGCACATT     | cacgacgctctccgatctAACGCACATT         | CWGAATGTGCGTTagatcggaagagcgctcgtg       |
| 11 | GAGCGACAT      | cacgacgctctccgatctGAGCGACAT          | CWGATGTCGCTCagatcggaagagcgctcgtg        |
| 12 | CCTTGCCATT     | cacgacgctctccgatctCCTTGCCATT         | CWGAATGGCAAGGagatcggaagagcgctcgtg       |
| 13 | GGTATA         | cacgacgctctccgatctGGTATA             | CWGTATAACagatcggaagagcgctcgtg           |
| 14 | TCTTGG         | cacgacgctctccgatctTCTTGG             | CWGCCAAGAagatcggaagagcgctcgtg           |
| 15 | GGTGT          | cacgacgctctccgatctGGTGT              | CWGACACCagatcggaagagcgctcgtg            |
| 16 | GGATA          | cacgacgctctccgatctGGATA              | CWGTATCCagatcggaagagcgctcgtg            |
| 17 | CTAAGCA        | cacgacgctctccgatctCTAAGCA            | CWGTGCTTAGagatcggaagagcgctcgtg          |
| 18 | ATTAT          | cacgacgctctccgatctATTAT              | CWGATAATagatcggaagagcgctcgtg            |
| 19 | GCGCTCA        | cacgacgctctccgatctGCGCTCA            | CWGTGAGCGCagatcggaagagcgctcgtg          |
| 20 | ACTGCGAT       | cacgacgctctccgatctACTGCGAT           | CWGATCGCAGTagatcggaagagcgctcgtg         |
| 21 | TTCGTT         | cacgacgctctccgatctTTCGTT             | CWGAACGAAagatcggaagagcgctcgtg           |
| 22 | ATATAA         | cacgacgctctccgatctATATAA             | CWGTATATagatcggaagagcgctcgtg            |
| 23 | TGGCAACAGA     | cacgacgctctccgatctTGGCAACAGA         | CWGTCTGTTGCCAagatcggaagagcgctcgtg       |
| 24 | CTCGTCG        | cacgacgctctccgatctCTCGTCG            | CWGCGACGAGagatcggaagagcgctcgtg          |
| 25 | GCCTACCT       | cacgacgctctccgatctGCCTACCT           | CWGAGGTAGGagatcggaagagcgctcgtg          |
| 26 | CACCA          | cacgacgctctccgatctCACCA              | CWGTGGTgagatcggaagagcgctcgtg            |
| 27 | AATTAG         | cacgacgctctccgatctAATTAG             | CWGCTAATagatcggaagagcgctcgtg            |
| 28 | GGAACGA        | cacgacgctctccgatctGGAACGA            | CWGTGCTTCCagatcggaagagcgctcgtg          |
| 29 | ACAACCT        | cacgacgctctccgatctACAACCT            | CWGAGTTGTagatcggaagagcgctcgtg           |
| 30 | ACTGCT         | cacgacgctctccgatctACTGCT             | CWGAGCAGTagatcggaagagcgctcgtg           |
| 31 | CGTGGACAGT     | cacgacgctctccgatctCGTGGACAGT         | CWGACTGTCCACGagatcggaagagcgctcgtg       |
| 32 | TGGCACAGA      | cacgacgctctccgatctTGGCACAGA          | CWGTCTGTGCCAagatcggaagagcgctcgtg        |
| 33 | TGCTT          | cacgacgctctccgatctTGCTT              | CWGAAGCAagatcggaagagcgctcgtg            |
| 34 | GCAAGCCAT      | cacgacgctctccgatctGCAAGCCAT          | CWGATGGCTTGagatcggaagagcgctcgtg         |
| 35 | CGCACCAATT     | cacgacgctctccgatctCGCACCAATT         | CWGAATTGGTGCagatcggaagagcgctcgtg        |
| 36 | CTCGCGG        | cacgacgctctccgatctCTCGCGG            | CWGCCGCGAGagatcggaagagcgctcgtg          |
| 37 | AACTGG         | cacgacgctctccgatctAACTGG             | CWGCCAGTTagatcggaagagcgctcgtg           |
| 38 | ATGAGCAA       | cacgacgctctccgatctATGAGCAA           | CWGTGCTCATagatcggaagagcgctcgtg          |
| 39 | CTTGA          | cacgacgctctccgatctCTTGA              | CWGTCAAGagatcggaagagcgctcgtg            |
| 40 | GCGTCCT        | cacgacgctctccgatctGCGTCCT            | CWGAGGACGCagatcggaagagcgctcgtg          |
| 41 | ACCAGGA        | cacgacgctctccgatctACCAGGA            | CWGTCTTGGTagatcggaagagcgctcgtg          |
| 42 | CCACTCA        | cacgacgctctccgatctCCACTCA            | CWGTGAGTGagatcggaagagcgctcgtg           |
| 43 | TCACGGAAG      | cacgacgctctccgatctTCACGGAAG          | CWGCTTCCGTGAagatcggaagagcgctcgtg        |
| 44 | TATCA          | cacgacgctctccgatctTATCA              | CWGTGATAagatcggaagagcgctcgtg            |
| 45 | TAGCCAA        | cacgacgctctccgatctTAGCCAA            | CWGTGGCTAagatcggaagagcgctcgtg           |
| 46 | ATATGCCA       | cacgacgctctccgatctATATGCCA           | CWGTGGCGATATagatcggaagagcgctcgtg        |
| 47 | CTCTA          | cacgacgctctccgatctCTCTA              | CWGTAGAGagatcggaagagcgctcgtg            |
| 48 | GGTGACATT      | cacgacgctctccgatctGGTGACATT          | CWGAATGTGCACCagatcggaagagcgctcgtg       |

|    |            |                                     |                                          |
|----|------------|-------------------------------------|------------------------------------------|
| 49 | CTCTCGCAT  | cacgacgctctccgatctCTCTCGCAT         | CWGATGCGAGAGagatcggaagagcgctcgtg         |
| 50 | CAGAGGT    | cacgacgctctccgatctCAGAGGT           | CWGACCTCTGagatcggaagagcgctcgtg           |
| 51 | GCGTACAAT  | cacgacgctctccgatctGCGTACAAT         | CWGATTGTACGCagatcggaagagcgctcgtg         |
| 52 | CAGA       | acactcttccctacacgacgctctccgatctCAGA | CWGTCTGagatcggaagagcgctcgtgtagggaaagagtg |
| 53 | GTCGCCT    | cacgacgctctccgatctGTCGCCT           | CWGAGGCGACagatcggaagagcgctcgtg           |
| 54 | AATAACCAA  | cacgacgctctccgatctAATAACCAA         | CWGTTGGTTATTagatcggaagagcgctcgtg         |
| 55 | AATGAACGA  | cacgacgctctccgatctAATGAACGA         | CWGTCTGTCATTagatcggaagagcgctcgtg         |
| 56 | CGTCGCCACT | cacgacgctctccgatctCGTCGCCACT        | CWGAGTGGCGACGagatcggaagagcgctcgtg        |
| 57 | ATGGCAA    | cacgacgctctccgatctATGGCAA           | CWGTTGCCATagatcggaagagcgctcgtg           |
| 58 | GAAGCA     | cacgacgctctccgatctGAAGCA            | CWGTGCTTCagatcggaagagcgctcgtg            |
| 59 | AACGTGCCT  | cacgacgctctccgatctAACGTGCCT         | CWGAGGCACGTTagatcggaagagcgctcgtg         |
| 60 | CCTCG      | cacgacgctctccgatctCCTCG             | CWGCGAGGagatcggaagagcgctcgtg             |
| 61 | CTCAT      | cacgacgctctccgatctCTCAT             | CWGATGAGagatcggaagagcgctcgtg             |
| 62 | ACGGTACT   | cacgacgctctccgatctACGGTACT          | CWGAGTACCGTagatcggaagagcgctcgtg          |
| 63 | GCGCCG     | cacgacgctctccgatctGCGCCG            | CWGCGGCGCagatcggaagagcgctcgtg            |
| 64 | CAAGT      | cacgacgctctccgatctCAAGT             | CWGACTTGagatcggaagagcgctcgtg             |
| 65 | TCCGAG     | cacgacgctctccgatctTCCGAG            | CWGTCTCGAagatcggaagagcgctcgtg            |
| 66 | TAGATGA    | cacgacgctctccgatctTAGATGA           | CWGTCTATCAagatcggaagagcgctcgtg           |
| 67 | TGGCCAG    | cacgacgctctccgatctTGGCCAG           | CWGTCTGCCAagatcggaagagcgctcgtg           |
| 68 | GCACGAT    | cacgacgctctccgatctGCACGAT           | CWGATCGTGCagatcggaagagcgctcgtg           |
| 69 | TTGCTG     | cacgacgctctccgatctTTGCTG            | CWGCAGCAAagatcggaagagcgctcgtg            |
| 70 | CGCAACCAGT | cacgacgctctccgatctCGCAACCAGT        | CWGACTGGTTGCGagatcggaagagcgctcgtg        |
| 71 | TCACTG     | cacgacgctctccgatctTCACTG            | CWGCAGTGAagatcggaagagcgctcgtg            |
| 72 | ACAGT      | cacgacgctctccgatctACAGT             | CWGACTGTagatcggaagagcgctcgtg             |
| 73 | GGAGTCAAG  | cacgacgctctccgatctGGAGTCAAG         | CWGCTTGACTCCagatcggaagagcgctcgtg         |
| 74 | CGAT       | acactcttccctacacgacgctctccgatctCGAT | CWGATCGagatcggaagagcgctcgtgtagggaaagagtg |
| 75 | CATAT      | cacgacgctctccgatctCATAT             | CWGATATGagatcggaagagcgctcgtg             |
| 76 | GTGACACAT  | cacgacgctctccgatctGTGACACAT         | CWGATGTGTCAcagatcggaagagcgctcgtg         |
| 77 | TATGT      | cacgacgctctccgatctTATGT             | CWGACATAagatcggaagagcgctcgtg             |
| 78 | CAGTGCCATT | cacgacgctctccgatctCAGTGCCATT        | CWGAATGGCACTGagatcggaagagcgctcgtg        |
| 79 | ACAACCAACT | cacgacgctctccgatctACAACCAACT        | CWGAGTTGGTTGTagatcggaagagcgctcgtg        |
| 80 | TGCAGA     | cacgacgctctccgatctTGCAGA            | CWGTCTGCAagatcggaagagcgctcgtg            |
| 81 | CATCTGCCG  | cacgacgctctccgatctCATCTGCCG         | CWGCGGCAGATGagatcggaagagcgctcgtg         |
| 82 | AGGC       | acactcttccctacacgacgctctccgatctAGGC | CWGGCTagatcggaagagcgctcgtgtagggaaagagtg  |
| 83 | ATCTGT     | cacgacgctctccgatctATCTGT            | CWGACAGATagatcggaagagcgctcgtg            |
| 84 | AAGACGCT   | cacgacgctctccgatctAAGACGCT          | CWGAGCGTCTTagatcggaagagcgctcgtg          |
| 85 | GAATGCAATA | cacgacgctctccgatctGAATGCAATA        | CWGTATTGCATTcagatcggaagagcgctcgtg        |
| 86 | GATC       | acactcttccctacacgacgctctccgatctGATC | CWGGATCagatcggaagagcgctcgtgtagggaaagagtg |
| 87 | ATCCG      | cacgacgctctccgatctATCCG             | CWGCGGATagatcggaagagcgctcgtg             |
| 88 | CTTAG      | cacgacgctctccgatctCTTAG             | CWGCTAAGagatcggaagagcgctcgtg             |
| 89 | TTATTACAT  | cacgacgctctccgatctTTATTACAT         | CWGATGTAATAAagatcggaagagcgctcgtg         |
| 90 | GCCAACAAGA | cacgacgctctccgatctGCCAACAAGA        | CWGTCTTGTTGGCagatcggaagagcgctcgtg        |
| 91 | TGCCGCAT   | cacgacgctctccgatctTGCCGCAT          | CWGATGCGGCAagatcggaagagcgctcgtg          |
| 92 | CGTGCA     | cacgacgctctccgatctCGTGCA            | CWGTGACACGagatcggaagagcgctcgtg           |
| 93 | CAACCACACA | cacgacgctctccgatctCAACCACACA        | CWGTGTGTGGTTGagatcggaagagcgctcgtg        |
| 94 | GCTCCGA    | cacgacgctctccgatctGCTCCGA           | CWGTCTGGAGCagatcggaagagcgctcgtg          |
| 95 | TCAGAGAT   | cacgacgctctccgatctTCAGAGAT          | CWGATCTCTGAagatcggaagagcgctcgtg          |
| 96 | CGTTCA     | cacgacgctctccgatctCGTTCA            | CWGTGAACGagatcggaagagcgctcgtg            |



Supplementary Table 7. Primer sequences used for qRT-PCR analysis of genes located in the QTL *UVBR12-1* for UV-B stress resistance.

| Gene ID         | Gene description                   | Forward sequence (5'-3') | Reverse sequence (5'-3') | product size (bp) |
|-----------------|------------------------------------|--------------------------|--------------------------|-------------------|
| Glyma.12g088600 | Spectrin beta chain, brain (SPTBN) | TCAATGGTGGTGCAGTGGT      | ATTCCTCTCCCTCTCGCTTC     | 98                |
| Glyma.12g088700 | bZIP TF21/TGA9                     | GGCAATTGTTCTGCAAGGAA     | AGGGGAACATTTCCAGTGTG     | 98                |
| Glyma.18g290800 | Actin11                            | CGGTGGTTCTATCTTGGCATC    | GTCTTTGCTTCAATAACCCTA    | 142               |

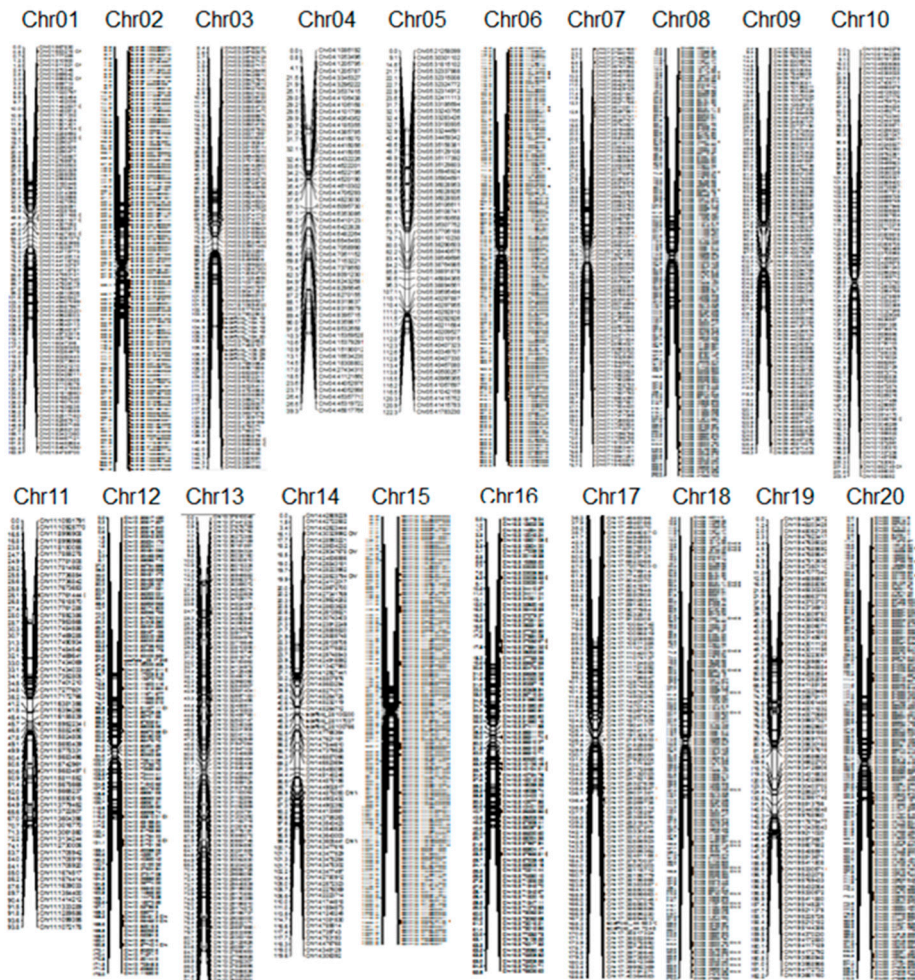

Supplementary Figure 1. Genetic linkage map including 3,136 SNP markers from the Cheongja 3 x Buseok population.

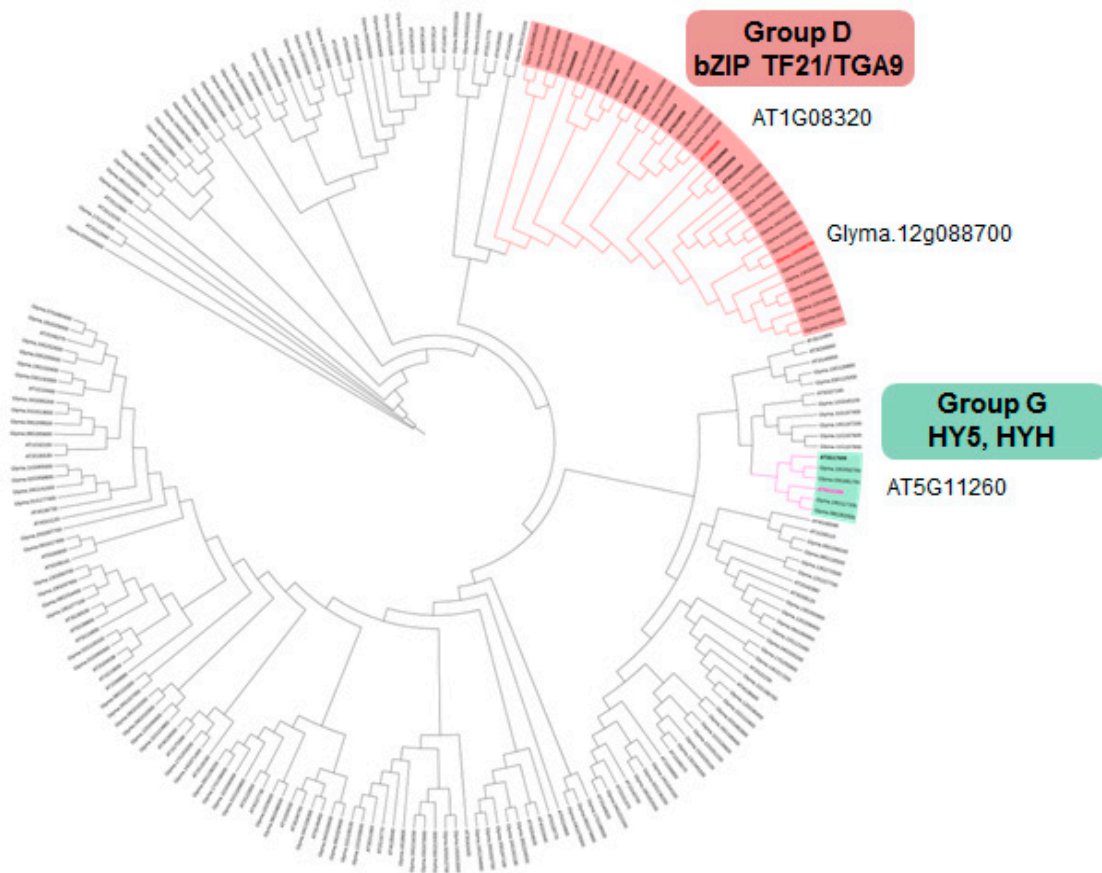

Supplementary Figure 2. Phylogenetic tree of bZIP transcription factors from *G. max* and *A. thaliana*. The bZIP21/TGA9 orthologs Glyma.12g088700 and AT1G08320 belong to a different cluster from that including HY5 (AT5g11260).
